# Supplementary material
Source: Elsevier journal article supplement (https://www.sciencedirect.com/science/article/pii/S0365669119302679)

# Archivos de la Sociedad Espanola de Oftalmologia

## Experiencia del uso de la toxina botulínica tipo A para el tratamiento sintomático del epiblefaron en pacientes menores de 2 años.

--Borrador del manuscrito--

|                            |                                                                                                                                                                                                                                                                                                                                                                                                                                                                                                                                                                                                                                                                                                                                                                                                                                                                                                                                                                                                                                                                                                                                                                                                                                                                                                                                                                                                                                                                                                                                                                                                                                                                                                                                                                                                                                                                                                                                                                                                                                                                                                                                                                                                                                                                                                                                                                                                         |
|----------------------------|---------------------------------------------------------------------------------------------------------------------------------------------------------------------------------------------------------------------------------------------------------------------------------------------------------------------------------------------------------------------------------------------------------------------------------------------------------------------------------------------------------------------------------------------------------------------------------------------------------------------------------------------------------------------------------------------------------------------------------------------------------------------------------------------------------------------------------------------------------------------------------------------------------------------------------------------------------------------------------------------------------------------------------------------------------------------------------------------------------------------------------------------------------------------------------------------------------------------------------------------------------------------------------------------------------------------------------------------------------------------------------------------------------------------------------------------------------------------------------------------------------------------------------------------------------------------------------------------------------------------------------------------------------------------------------------------------------------------------------------------------------------------------------------------------------------------------------------------------------------------------------------------------------------------------------------------------------------------------------------------------------------------------------------------------------------------------------------------------------------------------------------------------------------------------------------------------------------------------------------------------------------------------------------------------------------------------------------------------------------------------------------------------------|
| Número del manuscrito:     | OFTALMOLOGIA-D-19-00122R1                                                                                                                                                                                                                                                                                                                                                                                                                                                                                                                                                                                                                                                                                                                                                                                                                                                                                                                                                                                                                                                                                                                                                                                                                                                                                                                                                                                                                                                                                                                                                                                                                                                                                                                                                                                                                                                                                                                                                                                                                                                                                                                                                                                                                                                                                                                                                                               |
| Tipo de artículo:          | Original                                                                                                                                                                                                                                                                                                                                                                                                                                                                                                                                                                                                                                                                                                                                                                                                                                                                                                                                                                                                                                                                                                                                                                                                                                                                                                                                                                                                                                                                                                                                                                                                                                                                                                                                                                                                                                                                                                                                                                                                                                                                                                                                                                                                                                                                                                                                                                                                |
| Palabras clave:            | Epiblefaron; tratamiento no quirúrgico; Toxina botulínica tipo A; malposición palpebral congénita.<br><br>Epiblepharon; non surgical treatment; Botulinum toxin type A; congenital eyelid malpositions.                                                                                                                                                                                                                                                                                                                                                                                                                                                                                                                                                                                                                                                                                                                                                                                                                                                                                                                                                                                                                                                                                                                                                                                                                                                                                                                                                                                                                                                                                                                                                                                                                                                                                                                                                                                                                                                                                                                                                                                                                                                                                                                                                                                                 |
| Autor correspondiente:     | yésica de la fuente diez<br><br>burgos, SPAIN                                                                                                                                                                                                                                                                                                                                                                                                                                                                                                                                                                                                                                                                                                                                                                                                                                                                                                                                                                                                                                                                                                                                                                                                                                                                                                                                                                                                                                                                                                                                                                                                                                                                                                                                                                                                                                                                                                                                                                                                                                                                                                                                                                                                                                                                                                                                                           |
| Primer autor:              | yésica de la fuente diez                                                                                                                                                                                                                                                                                                                                                                                                                                                                                                                                                                                                                                                                                                                                                                                                                                                                                                                                                                                                                                                                                                                                                                                                                                                                                                                                                                                                                                                                                                                                                                                                                                                                                                                                                                                                                                                                                                                                                                                                                                                                                                                                                                                                                                                                                                                                                                                |
| Orden de autores:          | yésica de la fuente diez<br>Osiris Olvera Morales, MD<br>Carlos Yuck Chen López<br>José Luis Tovilla Canales<br>Ángel Nava Castañeda, PhD                                                                                                                                                                                                                                                                                                                                                                                                                                                                                                                                                                                                                                                                                                                                                                                                                                                                                                                                                                                                                                                                                                                                                                                                                                                                                                                                                                                                                                                                                                                                                                                                                                                                                                                                                                                                                                                                                                                                                                                                                                                                                                                                                                                                                                                               |
| Resumen:                   | <p>INTRODUCCIÓN: El epiblefaron es una malposición palpebral congénita ocasionada por un pliegue redundante de piel y músculo orbicular que invierte las pestañas hacia el globo ocular. OBJETIVO: Reportamos nuestra experiencia en la corrección no quirúrgica del epiblefaron sintomático usando una inyección en el músculo orbicular pretarsal de 5 Unidades de toxina botulínica tipo A (TbA). MATERIAL Y MÉTODOS: Revisamos los expedientes de los pacientes menores de 2 años con epiblefaron tratados con TbA. Evaluamos los síntomas y signos del epiblefaron, previo y posterior al tratamiento. RESULTADOS: Se incluyeron un total de 40 pacientes (28 niñas [70%]). La edad media de presentación fue 11 meses (rango 4-24). Se trataron 76 párpados con TbA. Obtuvimos una mejoría estadísticamente significativa de los síntomas, del toque cilio corneal y de la afectación corneal tras la aplicación de 5 unidades de TbA. El periodo medio de seguimiento fue de 25,55 semanas (rango 4-92). CONCLUSIONES: Con este estudio demostramos que la aplicación de toxina botulínica es un tratamiento efectivo y seguro para la corrección del epiblefaron sintomático en niños menores de 2 años. INTRODUCTION: Epiblepharon is a congenital eyelid malposition due to a horizontal skin fold and redundant orbicular muscle, resulting in the inturning of the eyelashes. OBJECTIVE: We report our experience in the non surgical correction of symptomatic epiblepharon using a pretarsal injection of 5IU of Botulinum toxin type A (BoNT-A) in the orbicular muscle. MATERIALS AND METHODS: Patients with epiblepharon younger than 2 year were included in the study and their charts were reviewed. Symptoms and signs of epiblepharon were evaluated before and after treatment with BoNT-A. RESULTS: 40 patients were included (28 girls [70%]). Average age at treatment was 11 months (range, 4-24 months). 76 eyelids were treated with BoNT-A. A statistically significant improvement in symptoms, lash-corneal touch and punctate corneal epitheliopathy were reported after the treatment with 5IU BoNT-A. Average final follow-up was 25.5 weeks (range, 4-92 months). CONCLUSION: The present study evidences that a pretarsal BoNT-A injection is an effective and safe treatment for the correction of symptomatic epiblepharon in patients younger than 2 years.</p> |
| Revisores sugeridos:       |                                                                                                                                                                                                                                                                                                                                                                                                                                                                                                                                                                                                                                                                                                                                                                                                                                                                                                                                                                                                                                                                                                                                                                                                                                                                                                                                                                                                                                                                                                                                                                                                                                                                                                                                                                                                                                                                                                                                                                                                                                                                                                                                                                                                                                                                                                                                                                                                         |
| Respuesta a los revisores: | Carta con las modificaciones sugeridas:<br><br>Respondiendo a los comentarios del primer revisor:<br>Punto 1: con respecto al contacto cilio corneal en un 67% de los párpados tratados                                                                                                                                                                                                                                                                                                                                                                                                                                                                                                                                                                                                                                                                                                                                                                                                                                                                                                                                                                                                                                                                                                                                                                                                                                                                                                                                                                                                                                                                                                                                                                                                                                                                                                                                                                                                                                                                                                                                                                                                                                                                                                                                                                                                                 |

con TbA persistía el contacto de las pestañas con la córnea, sin embargo podemos inferir que hubo una mejoría del epiblefaron ya que el lagrimeo desapareció en el 72% de los ojos. Otra explicación factible para los resultados obtenidos puede ser que durante la exploración oftalmológica el contacto cilio corneal estuviese presente, por una mayor contracción voluntaria del músculo orbicular y en otras horas del día pudiese mejorar.

Con respecto al comentario sobre la curación, añadido la siguiente información: al finalizar el seguimiento el porcentaje de resolución del epiblefaron fue de un 43% (33 párpados). En estos pacientes el tiempo de seguimiento medio fue de 33 semanas (rango 4-90). Del 57% (43 párpados) que no tuvieron resolución completa del epiblefaron la sintomatología del lagrimeo desapareció en el 56% tras el tratamiento con TbA. Los datos descritos en la figura 1 se refieren a los obtenidos tras la primera aplicación de TbA, hay que tener en cuenta que un pequeño porcentaje de párpados necesito más de una dosis de TbA, por eso al finalizar el seguimiento los porcentajes varían. Sin embargo no podemos saber si el tratamiento con TbA adelantó la curación, puesto que sería necesario tener un grupo control. Una de las debilidades de este estudio es su carácter retrospectivo. Este tema lo desarrollo en los siguientes puntos.

Punto 2: en la discusión hemos añadido la necesidad de realizar un estudio comparativo entre los diferentes métodos no quirúrgicos para el tratamiento del epiblefaron que sería la iyección de ácido hialurónico y la toxina botulínica.

Punto 3: Igualmente sería adecuado realizar un estudio dónde se pueda comparar la evolución espontánea frente a la cirugía para corrección del epiblefaron. En nuestra institución se espera al menos que el paciente tenga 2 años para realizar una cirugía de corrección de epiblefaron.

Punto 4: Con respecto a la técnica usada para aplicar la toxina botulínica, se optó por la inmovilización de los pacientes en consulta. La aplicación de TbA a nivel pretarsal del músculo orbicular es una técnica mínimamente invasiva, que no precisa de anestesia general. Consideramos que la inyección al ser con una aguja fina y poca cantidad, es un procedimiento que se puede efectuar de forma segura en la consulta. Es verdad que no podemos cuantificar el sufrimiento del niño aunque lo podríamos comparar con lo que sufre con una vacuna. Otra opción es realizar el procedimiento en quirófano con anestesia inhalatoria con mascarilla laríngea. Esta información se ha añadido a la discusión.

Respondiendo a los comentarios del segundo revisor:

Punto 1: como indicó en las correcciones hemos modificado el título del artículo acortándolo y ha quedado de la siguiente manera:

“Experiencia del uso de la toxina botulínica tipo A para el tratamiento sintomático del epiblefaron en pacientes menores de 2 años.”

“Treatment of symptomatic epiblepharon with Botulinum toxin type A in patients younger than two years.”

Punto 2: se ha modificado en el artículo la palabra “toque”, sustituyéndola por “contacto”.

Punto 3: se han añadido una nueva figura y la gráfica se ha subido en dos formatos diferentes.

Punto 4: se ha añadido en material y métodos la especificación del tipo de jeringuilla, “utilizando una jeringuilla de 1 ml con aguja de insulina de 31G”.

Punto 5: en la discusión se han añadido las limitaciones del estudio y se han reforzado en la conclusión.

Ciudad de México, 7 abril 2019

## Carta de presentación

Estimado Editor de los Archivos de la Sociedad Española de Oftalmología,

Le envío nuestro manuscrito titulado "Experiencia del uso de la toxina botulínica tipo A para el tratamiento sintomático del epiblefaron en pacientes menores de 2 años en el Instituto de Oftalmología Conde Valenciana (I.A.P.) CDMX, México".

Confirmamos que este manuscrito no ha sido publicado en otro lugar y no está siendo considerado por otra revista. Todos los autores han aprobado el manuscrito y están de acuerdo con su presentación a los Archivos de la Sociedad Española de Oftalmología.

Se trata de un estudio retrospectivo, comparativo y longitudinal.

El primer reporte de casos de aplicación de toxina botulínica tipo A (TbA) para el tratamiento de epiblefaron, se llevó a cabo en el Instituto Oftalmológico Conde Valenciana por el Dr. Navas y el Dr. Chen, con buenos resultados. Por ello desde el 2012 se aplicó TbA en la región pretarsal del músculo orbicular, a los pacientes menores de 2 años con epiblefaron sintomático, que acudían a la consulta de oculoplástica de dicha institución, previo el consentimiento informado de los tutores legales. Es un tratamiento que mejora la sintomatología del epiblefaron mientras esperamos a su resolución espontánea. Sin embargo, desconocíamos la tasa de éxito en la mejoría de los síntomas y signos del epiblefaron en dichos pacientes tras la aplicación de TbA. Con el presente estudio pretendíamos valorar los resultados obtenidos tras la aplicación de TbA en pacientes con epiblefaron.

Nuestra hipótesis de trabajo fue que el uso de TbA para el tratamiento de epiblefaron en pacientes menores de 2 años es un procedimiento no quirúrgico, seguro, que mejora la sintomatología en más del 70% de los párpados.

En este estudio realizamos una revisión de expedientes clínicos de los pacientes con epiblefaron, incluimos dentro del estudio a los pacientes menores de 2 años que habían sido tratados con una inyección pretarsal de 5UI de TbA y valoramos la presencia de lagrimeo, el toque cilio corneal y la presencia de queratitis antes y después de la aplicación de TbA. Se realizó un análisis estadístico con la prueba de  $X^2$  y el test exacto de Fischer y se obtuvo una diferencia estadísticamente significativa,  $p < 0,05$ , en los signos y síntomas del epiblefaron antes y después del tratamiento.

Consideramos que es importante difundir nuestro estudio en esta revista para dar a conocer nuestros resultados y proponer esta técnica no quirúrgica para la corrección del epiblefaron, ya que es una patología frecuente en nuestro medio. La aplicación de TbA a nivel pretarsal del músculo orbicular es una técnica mínimamente invasiva, que no precisa de anestesia general. Se puede reproducir fácilmente en el consultorio por un oftalmólogo general. Se trata de un procedimiento reversible, ya que el tiempo de duración de la acción de la toxina suele ser unos 6 meses, aunque sabemos que esto puede variar de un paciente a otro. Sería interesante que en más hospitales se pueda realizar

dicho tratamiento y poder llevar a cabo un ensayo clínico aleatorizado para determinar la efectividad del uso de TbA frente al tratamiento conservador, valorar el número de aplicaciones necesarias de toxina botulínica y el intervalo entre cada dosis, para optimizar el periodo libre de síntomas en los pacientes que presentan epibleftaron sintomático.

Para cualquier aclaración o mayor información, ruego ponerse en contacto con Yésica de la Fuente Díez al siguiente correo electrónico: [jesicadelafuentediez@gmail.com](mailto:jesicadelafuentediez@gmail.com), que es la autora principal de dicho manuscrito.

## **Título:**

Experiencia del uso de la toxina botulínica tipo A para el tratamiento sintomático del epiblefaron en pacientes menores de 2 años.

Treatment of symptomatic epiblepharon with Botulinum toxin type A in patients younger than two years.

## **Nombres y filiaciones de los autores:**

Dra. Yésica de la Fuente Díez

Dirección: Chimalpopoca 14, Centro, 06800 Ciudad de México, CDMX  
[jesicadelafuentediez@gmail.com](mailto:jesicadelafuentediez@gmail.com)

Dra. Osiris Olvera Morales Departamento de Órbita y Oculoplástica

Dirección: Chimalpopoca 14, Centro, 06800 Ciudad de México, CDMX  
[draosiris@hotmail.com](mailto:draosiris@hotmail.com)

Dr. Carlos Yuck Chen López

Instituto oftalmológico Conde de Valenciana (I.A.P) CDMX

Dirección: Chimalpopoca 14, Centro, 06800 Ciudad de México, CDMX  
[yuckchen@gmail.com](mailto:yuckchen@gmail.com)

Dr. José Luis Tovilla Canales. Jefe del Departamento de Órbita y Oculoplástica Instituto oftalmológico Conde de Valenciana (I.A.P)

Dirección: Chimalpopoca 14, Centro, 06800 Ciudad de México, CDMX  
[jltovilla@yahoo.com](mailto:jltovilla@yahoo.com)

PhD Ángel Nava Castañeda. Médico Adscrito Departamento de Órbita y Oculoplástica Instituto oftalmológico Conde de Valenciana (I.A.P)

Dirección: Chimalpopoca 14, Centro, 06800 Ciudad de México, CDMX  
[angellusnc@hotmail.com](mailto:angellusnc@hotmail.com)

## **Autor de correspondencia:**

Yésica de la Fuente Díez

**Dirección permanente:** Plaza San Miguel n.9, 09105 Villacienco (Burgos) España. [jesicadelafuentediez@gmail.com](mailto:jesicadelafuentediez@gmail.com)

Alta especialidad en cirugía de órbita, oculoplástica y vía lagrimal.

Instituto oftalmológico Conde de Valenciana (I.A.P) CDMX

## **Financiación:**

La presente investigación no ha recibido ayudas específicas provenientes de agencias del sector público, sector comercial o entidades sin ánimo de lucro.

## Título:

Experiencia del uso de la toxina botulínica tipo A para el tratamiento sintomático del epiblefaron en pacientes menores de 2 años.

Treatment of symptomatic epiblepharon with Botulinum toxin type A in patients younger than two years.

## Resumen estructurado:

## INTRODUCCIÓN:

El epiblefaron es una malposición palpebral congénita ocasionada por un pliegue redundante de piel y músculo orbicular que invierte las pestañas hacia el globo ocular.

## OBJETIVO:

Reportamos nuestra experiencia en la corrección no quirúrgica del epiblefaron sintomático usando una inyección en el músculo orbicular pretarsal de 5 Unidades de toxina botulínica tipo A (TbA).

## MATERIAL Y MÉTODOS:

Revisamos los expedientes de los pacientes menores de 2 años con epiblefaron tratados con TbA. Evaluamos los síntomas y signos del epiblefaron, previo y posterior al tratamiento.

## RESULTADOS:

Se incluyeron un total de 40 pacientes (28 niñas [70%]). La edad media de presentación fue 11 meses (rango 4-24). Se trataron 76 párpados con TbA. Obtuvimos una mejoría estadísticamente significativa de los síntomas, del contacto cilio corneal y de la afectación corneal tras la aplicación de 5 unidades de TbA. El periodo medio de seguimiento fue de 25,55 semanas (rango 4-92).

## CONCLUSIONES:

Con este estudio demostramos que la aplicación de TbA es un tratamiento efectivo y seguro para la corrección del epiblefaron sintomático en niños menores de 2 años.

## Abstract

## INTRODUCTION:

Epiblepharon is a congenital eyelid malposition due to a horizontal skin fold and redundant orbicular muscle, resulting in the inturning of the eyelashes.

## OBJECTIVE:

We report our experience in the non surgical correction of symptomatic epiblepharon using a pretarsal injection of 5IU of Botulinum toxin type A (BoNT-A) in the orbicular muscle.

TbA toxina botulínica tipo A

## MATERIALS AND METHODS:

Patients with epiblepharon younger than 2 year were included in the study and their charts were reviewed. Symptoms and signs of epiblepharon were evaluated before and after treatment with BoNT-A.

## RESULTS:

40 patients were included (28 girls [70%]). Average age at treatment was 11 months (range, 4-24 months). 76 eyelids were treated with BoNT-A. A statistically significant improvement in symptoms, lash-corneal touch and punctate corneal epitheliopathy were reported after the treatment with 5IU BoNT-A. Average final follow-up was 25.5 weeks (range, 4-92 months).

## CONCLUSIONS:

The present study evidences that a pretarsal BoNT-A injection is an effective and safe treatment for the correction of symptomatic epiblepharon in patients younger than 2 years.

## Palabras Clave:

Epiblefaron; tratamiento no quirúrgico; Toxina botulínica tipo A; malposición palpebral congénita.

## Key words:

Epiblepharon; non surgical treatment; Botulinum toxin type A; congenital eyelid malpositions.

## Introducción

El epiblefaron es una anomalía congénita del párpado, caracterizada por un pliegue de la piel y músculo orbicular subyacente que empuja las pestañas hacia el globo ocular<sup>(1)</sup>. Las manifestaciones clínicas dependen de la cantidad de pestañas invertidas y del grado de roce ocular. Los síntomas más comunes son: molestias oculares, ojo rojo, secreción y lagrimeo<sup>(2)</sup>. Su prevalencia disminuye con la edad y es más frecuente en población asiática<sup>(3)</sup>.

Se resuelve de manera espontánea entre los 2 y 3 años de edad con el crecimiento de las estructuras faciales. Sin embargo, en niños muy sintomáticos y con afectación corneal es preciso realizar un tratamiento para evitar secuelas en su capacidad visual. Existen diferentes tratamientos quirúrgicos para los casos severos. Sin embargo, el propósito de este estudio es valorar la eficacia de un tratamiento no quirúrgico, que consiste en la aplicación de TbA sobre la porción pretarsal del músculo orbicular<sup>(4)</sup>. La aplicación de TbA para el tratamiento del epiblefaron sintomático fue descrita por primera vez por Chen CY y Nava-Castañeda.

## Material y métodos

Es un estudio retrospectivo, longitudinal, realizado en el Instituto oftalmológico Conde de Valenciana (I.A.P) CDMX. Revisamos los expedientes de todos los

TbA toxina botulínica tipo A

pacientes con epibleftaron entre enero del 2012 a julio del 2017. El presente estudio cumple con los requisitos de la Declaración de Helsinki y fue aprobado por el Comité de Investigación del Instituto de Oftalmología Fundación Conde Valenciana 17CI 09015008. Incluimos en el estudio aquellos pacientes con diagnóstico de epibleftaron, tratados de primera instancia con TbA antes de los 2 años de edad. Excluimos aquellos pacientes con enfermedades sistémicas, cirugías previas de párpados o malposiciones concomitantes del párpado. Eliminamos a los pacientes que perdieron seguimiento tras la aplicación de la TbA. Recopilamos los siguientes datos de los expedientes clínicos: edad, sexo, antecedentes patológicos y lateralidad del ojo afectado. Nuestras variables dependientes fueron: el lagrimeo, el contacto cilio corneal, la afectación corneal y la dosis total de unidades de TbA aplicada en cada párpado. El lagrimeo fue medido como ausente o presente. El contacto cilio corneal lo definimos como presencia de contacto de las pestañas con el globo ocular. La afectación corneal la definimos como presencia de queratitis, evaluada con tinción de fluoresceína. Estas variables dependientes las medimos con una escala nominal dicotómica en la visita previa a la aplicación de TbA y en las visitas subsecuentes de control.

Todos los procedimientos tuvieron lugar en la consulta. Se inmovilizó al paciente de forma adecuada. Se colaboró con su progenitor que lo envolvía en una sábana quirúrgica dejando al descubierto la cabeza. Se recostaba al niño sobre la camilla arropado con la sábana, con la cabeza bien sujeta. Se aplicaron gotas de anestésico ocular, hidrocloreuro de tetracaína al 5%, en la superficie del ojo (Ponti-Ofteno, Sophia, México). El lugar de inyección se limpió con una torunda empapada en alcohol al 70%. El tratamiento consistió en la inyección de 5 Unidades de (ona-BoNT/A; Botox®, Allergan, Inc, Irvine, CA) utilizando una jeringilla de 1 ml con aguja de insulina de 31G (Plastipak, Edo. De México, México). Se aplicó en la región medial de la porción pretarsal del músculo orbicular, a 3-4mm del borde libre palpebral del lado afectado<sup>(4)</sup>.

Realizamos estadística descriptiva para todas las variables y estadística inferencial con  $X^2$  y el test exacto de Fisher para analizar las variables dependientes. Usamos el paquete estadístico SPSS versión 22, considerando un valor de  $p < 0.05$  como significativo.

## Resultados

De los expedientes revisados, 40 pacientes cumplían criterios de inclusión y tenían al menos una visita post aplicación de TbA. Se aplicó TbA en 76 párpados, ya que en 4 pacientes el epibleftaron era sintomático sólo en un ojo. El 70% (28 pacientes) eran de sexo femenino. La edad promedio cuando se aplicó la primera dosis de TbA fue de 11 meses (rango 4-24). El tiempo medio de seguimiento de los pacientes fue de 25,55 semanas (rango 4-92). Cada aplicación de TbA fue de 5 Unidades. En 59 párpados se aplicó una sola vez TbA, en 16 párpados se aplicó 2 veces y en 1 párpado 3 veces. El tiempo medio entre una aplicación y otra fue de  $19 \pm 8$  semanas.

Según la clasificación de Khwarg and Lee <sup>(1)</sup> con la escala de afectación corneal, el 74% (56 ojos) se encontraban en clase I, no presentaban afectación corneal. El 26 % (20 ojos) fueron clasificados como clase II, afectación corneal de menos de

TbA toxina botulínica tipo A



2/3 de la córnea. Tras la aplicación de 5UI TbA, en la primera visita de control, la afectación corneal se presentó sólo en el 13% de los ojos. El 87% (66 ojos) presentaban toque cilio corneal previo a la aplicación de TbA, disminuyendo dicho porcentaje al 67% (51 ojos) tras la aplicación de TbA. En la figura 2 y 3 se muestran los resultados clínicos obtenidos en dos de los pacientes del estudio. Todos los ojos presentaban síntomas de lagrimeo previo a la aplicación de TbA, mientras que en la visita subsecuente, desapareció el lagrimeo en el 72% (48 ojos). Estos cambios en los signos y síntomas del epiblefaron fueron estadísticamente significativos (Figura 3).

Los párpados que recibieron más de una aplicación de TbA, presentaron una mejoría en la sintomatología y el toque cilio corneal, sin embargo no hubo cambios en cuanto a la afectación corneal (Tabla 1).

No hubo ninguna complicación secundaria a la aplicación de TbA.

Al finalizar el seguimiento el porcentaje de resolución del epiblefaron fue de un 43% (33 párpados). En estos pacientes el tiempo de seguimiento medio fue de 33 semanas (rango 4-90). Del 57% (43 párpados) que no tuvieron resolución completa del epiblefaron la sintomatología del lagrimeo desapareció en el 56% tras el tratamiento con TbA.

#### Discusión:

El epiblefaron es una patología habitual en nuestra práctica diaria, cuya prevalencia en nuestra institución es de 8,58/100.000 pacientes. Se resuelve de manera natural con el crecimiento de las estructuras faciales. Sin embargo, mientras el epiblefaron está presente, causa sintomatología molesta para el paciente, como lagrimeo y secreción. Puede afectar la integridad de la córnea, causando queratitis debido al contacto cilio corneal. Los casos más severos presentan defectos epiteliales y leucomas que pueden provocar una disminución de la agudeza visual. Es importante el tratamiento médico del epiblefaron con lubricantes oculares, preferiblemente en presentación de ungüento, ya que nos ayudan a proteger la córnea<sup>(5)</sup>. Sin embargo en los casos en los que persiste la sintomatología a pesar del tratamiento, proponemos el uso de TbA inyectada en la porción pretarsal del músculo orbicular del párpado inferior. Esta técnica fue descrita por primera vez, por Chen CY y Nava-Castañeda, trataron 14 párpados con epiblefaron con una única dosis de 12.5IU de TbA (Dysport®) y encontraron una mejoría de los síntomas y signos del epiblefaron estadísticamente significativa<sup>(4)</sup>.

La TbA es una neurotoxina elaborada por *Clostridium botulinum*. Actúa uniéndose a las terminaciones nerviosas colinérgicas, donde se internaliza en la célula y provoca la inhibición de la liberación de la acetilcolina<sup>(6)</sup>. Se ha empleado para debilitar las fibras musculares en diferentes patologías. A nivel del párpado se ha usado para disminuir la función del músculo orbicular, inyectando la toxina sobre el vientre muscular. Steel et al<sup>(7)</sup> reportaron la mejoría del entropión involutivo tras el uso de TbA. Christiansen et al<sup>(8)</sup> emplearon 5 Unidades de TbA en un niño con entropión congénito con un buen resultado y sin efectos adversos. Deka et al<sup>(9)</sup> evaluaron la eficacia del tratamiento del entropión tanto senil como congénito, en

TbA toxina botulínica tipo A

17 pacientes, con una inyección de toxina botulínica sobre la porción preseptal del músculo orbicular. Obtuvieron una resolución transitoria del entropión que duró entre 8-26 semanas.

En el presente estudio, demostramos que la aplicación de TbA en pacientes menores de dos años con epiblefaron sintomático, mejora de manera estadísticamente significativa los síntomas de los pacientes, la afectación corneal y el contacto cilio corneal. La TbA disminuye la fuerza del músculo orbicular con lo que se consigue que haya un menor empuje de las pestañas hacia el globo ocular y esto mejora el lagrimeo.

Khwarg y Lee<sup>(1)</sup> propusieron una clasificación para valorar la severidad del epiblefaron según las siguientes características morfológicas: altura del pliegue cutáneo, toque cilio corneal y queratopatía. Según la escala corneal de la clasificación de Khwarg and Lee hubo una mejoría estadísticamente significativa de la afectación corneal tras la aplicación de TbA. Aunque en un 67% de los párpados tratados con TbA persistía el contacto de las pestañas con la córnea podemos inferir que hubo una mejoría del epiblefaron ya que el lagrimeo desapareció en el 72% de los ojos. Otra explicación factible para los resultados obtenidos puede ser que durante la exploración oftalmológica el contacto cilio corneal estuviese presente, por una mayor contracción voluntaria del músculo orbicular y en otras horas del día pudiese mejorar.

Durante el seguimiento de los pacientes no se reportó ningún efecto adverso debido a la aplicación de TbA. No hubo ningún paciente con retracción palpebral o lagofthalmos debido a la disminución de la contracción del músculo orbicular provocada por la TbA. Ni hubo afectación de la motilidad ocular por difusión de la TbA.

La aplicación de TbA a nivel pretarsal del músculo orbicular es una técnica mínimamente invasiva, que no precisa de anestesia general. Consideramos que la inyección al ser con una aguja fina y poca cantidad, es un procedimiento que se puede efectuar de forma segura en la consulta. Es verdad que no podemos cuantificar el sufrimiento del niño aunque lo podríamos comparar con el de una vacuna. Otra opción es realizar el procedimiento en quirófano con anestesia inhalatoria con mascarilla laríngea.

Se trata de un procedimiento reversible, ya que el tiempo de duración de la acción de la toxina suele ser unos 6 meses, aunque sabemos que esto puede variar de un paciente a otro. En este estudio el número máximo de aplicaciones de TbA fue de 3 en un párpado. En los casos que responden favorablemente a la TbA, se puede aplicar una nueva dosis de 5 unidades, cuando se revierta el efecto de la toxina y el epiblefaron vuelva a ser sintomático. El tiempo entre una dosis y otra varía en cada paciente, dependiendo del inicio y gravedad de los síntomas, por eso se recomienda un seguimiento de los pacientes continuado. En nuestro caso el intervalo de tiempo promedio entre una dosis y otra fue aproximadamente de 4 meses. Se necesitaría una muestra mayor de párpados tratados con más de una aplicación de toxina botulínica para obtener resultados que se puedan estandarizar.

Dentro de los procedimientos no quirúrgicos para el tratamiento del epiblefaron sintomático, está descrita la inyección de ácido hialurónico en el párpado inferior. Taban et al.<sup>(10)</sup> describe el uso de 0,3mL de Restylane (Q-Med AB, Sweden)

TbA toxina botulínica tipo A

inyectados en el plano de los retractores, obteniendo la corrección del epiblefaron en dos casos clínicos.

Naik et al.<sup>(11, 12)</sup> proponen el uso de ácido hialurónico en el plano suborbicular, entre el pliegue cutáneo y el margen palpebral. En su último estudio<sup>(12)</sup> evalúa la corrección del epiblefaron en 10 párpados tras la inyección transcutánea de ácido hialurónico Juvederm (Juvederm Ultra, Allergan, Irvine, CA) o Restylane (Medicis Aesthetics Inc, Scottsdale, AZ), con una dosis media de 0,19ml (rango 0,1-0,3ml). Obtuvo una mejoría de los síntomas, afectación corneal y toque cilio corneal en todos los casos. La aplicación de ácido hialurónico se realizó bajo anestesia con mascarilla laríngea. Consideramos que la aplicación de toxina botulínica, siendo igualmente un procedimiento no quirúrgico, es de menor costo y de mayor seguridad que la inyección de ácido hialurónico. Sería necesario realizar un ensayo clínico en que se comparasen ambas técnicas para obtener resultados más concluyentes.

Una de las limitaciones del estudio es su carácter retrospectivo y la ausencia de un grupo control.

En el caso de que, a los dos años de edad, no haya habido una resolución del epiblefaron y este sea sintomático o haya presencia de afectación corneal, se debe plantear un procedimiento quirúrgico para su corrección bajo anestesia general. Hay que valorar siempre los riesgos implícitos de la anestesia. La cirugía que normalmente realizamos en nuestro centro para la corrección del epiblefaron es la excisión de piel y músculo orbicular redundante a través de una incisión subciliar. Necesitaríamos realizar un estudio más minucioso para comparar en nuestra institución el porcentaje de resolución espontánea del epiblefaron frente a la resolución quirúrgica.

## Conclusiones:

Con este estudio demostramos que la aplicación de 5 Unidades de TbA inyectadas en la región pretarsal del músculo orbicular del párpado inferior, es una técnica segura que mejora la sintomatología y los signos del epiblefaron en pacientes menores de 2 años.

Sería necesario en un futuro realizar un ensayo clínico aleatorizado y multicéntrico para determinar la efectividad del uso de TbA, comparándolo con el tratamiento con inyección de ácido hialurónico y el tratamiento conservador. Se estudiaría también el número de aplicaciones necesarias de toxina botulínica y el intervalo entre cada dosis, para optimizar el periodo libre de síntomas en los pacientes que presentan epiblefaron sintomático. Es importante el seguimiento de los pacientes hasta la resolución del epiblefaron, para evitar el daño corneal y mejorar su calidad de vida.

## Referencias Bibliográficas:

TbA toxina botulínica tipo A

1. Khwarg SI, Lee YJ. Epiblepharon of the lower eyelid: classification and association with astigmatism. *Korean J Ophthalmol*. 1997 Dec;11(2):111-7, <https://doi.org/10.3341/kjo.1997.11.2.111>
2. Sundar G, Young SM, Tara S, et al. Epiblepharon in East Asian patients: the Singapore experience. *Ophthalmology* 2010; 117:184 – 189. <https://doi.org/10.1016/j.ophtha.2009.06.044>. Epub 2009 Nov 5.
3. Tan MC, Young S, Amrith S, Sundar G. Epidemiology of oculoplastic conditions: the Singapore experience. *Orbit* 2012; 31:107–113. <https://doi.org/doi:10.3109/01676830.2011.638095>.
4. Chen CY, Nava-Castaneda A. Successful treatment of lower eyelid epiblepharon by injection of botulinum toxin A in patients under two years of age. *Nepal J Ophthalmol* 2013; 5:177 – 181. <https://doi.org/10.3126/nepjoph.v5i2.8709>.
5. Simon JW, Williams KH, Zabal-Ratner JL, Barry GP Conservative Management of Lower Eyelid Epiblepharon in Children. *J Pediatr Ophthalmol Strabismus*. 2017 Jan 1;54(1):15-16. <https://doi.org/10.3928/01913913-20160810-02>.
6. E Setler, Paulette. (2002). Therapeutic Use of Botulinum Toxins: Background and History. *The Clinical journal of pain*. 18. S119-24. <https://doi.org/10.1097/00002508-200211001-00002>.
7. Steel DH, Hoh Hb, Hattad RA, Collins CR (1997). Botulium toxin for the treatment of involutional lower lid entropion: a clinical and morphological study. *Eye*; 11:472-5. <https://doi.org/10.1038/eye.1997.128>
8. Christiansen G, Mohny BG, Baratz KH, Bradley EA (2004) Botulinum toxin for the treatment of congenital entropion. *Am J Ophthalmol*. 2004 Jul;138(1):153-5. <https://doi.org/10.1016/j.ajo.2004.02.023>
9. Deka A, Saikia SP. (2011). Botulinum Toxin for Lower Lid Entropion Correction. *Orbit* 2011;30:40-2. <https://doi.org/10.3109/01676830.2010.544443>.
10. Taban M, Mancini R, Nakra T, et al. Nonsurgical management of congenital eyelid malpositions using hyaluronic Acid gel. *Ophthalmic Plast Reconstr Surg* 2009;25:259–63. <https://doi.org/10.1097/IOP.0b013e3181ac984b>.
11. Naik MN, Ali MJ, Das S, Honavar SG. Nonsurgical management of epiblepharon using hyaluronic acid gel. *Ophthal Plast Reconstr Surg* 2010; 26:215 – 217. <https://doi.org/10.1097/IOP.0b013e3181b9e655>.

TbA toxina botulínica tipo A

12. Naik MN, Pujari A, Ali MJ, et al. Nonsurgical correction of epiblepharon using hyaluronic acid gel. J AAPOS. 2018;22:179–82. <https://doi.org/10.1016/j.jaapos.2017.12.018>.

Apéndices:

Tabla 1. Comparación de los signos y síntomas del epiblefaron previa y post tratamiento según el número de aplicaciones de TbA.

| Variable                            | TbA             | Previo TbA(n) | Posterior TbA(n) | Valor p (<0.05) |
|-------------------------------------|-----------------|---------------|------------------|-----------------|
| Afectación corneal (Con queratitis) | 1 aplicación    | 29% (17)      | 14% (8)          | 0.005*          |
|                                     | ≥2 aplicaciones | 18%(3)        | 18%(3)           | 0.465           |
| Toque cilio corneal (Presente)      | 1 aplicación    | 83% (49)      | 56% (33)         | 0.004*          |
|                                     | ≥2 aplicaciones | 100%(17)      | 59%(10)          | 1               |
| Lagrimeo (Presente)                 | 1 aplicación    | 100% (59)     | 31% (18)         | 1               |
|                                     | ≥2 aplicaciones | 94%(16)       | 18%(3)           | 0.000*          |

\*Test exacto de Fisher.

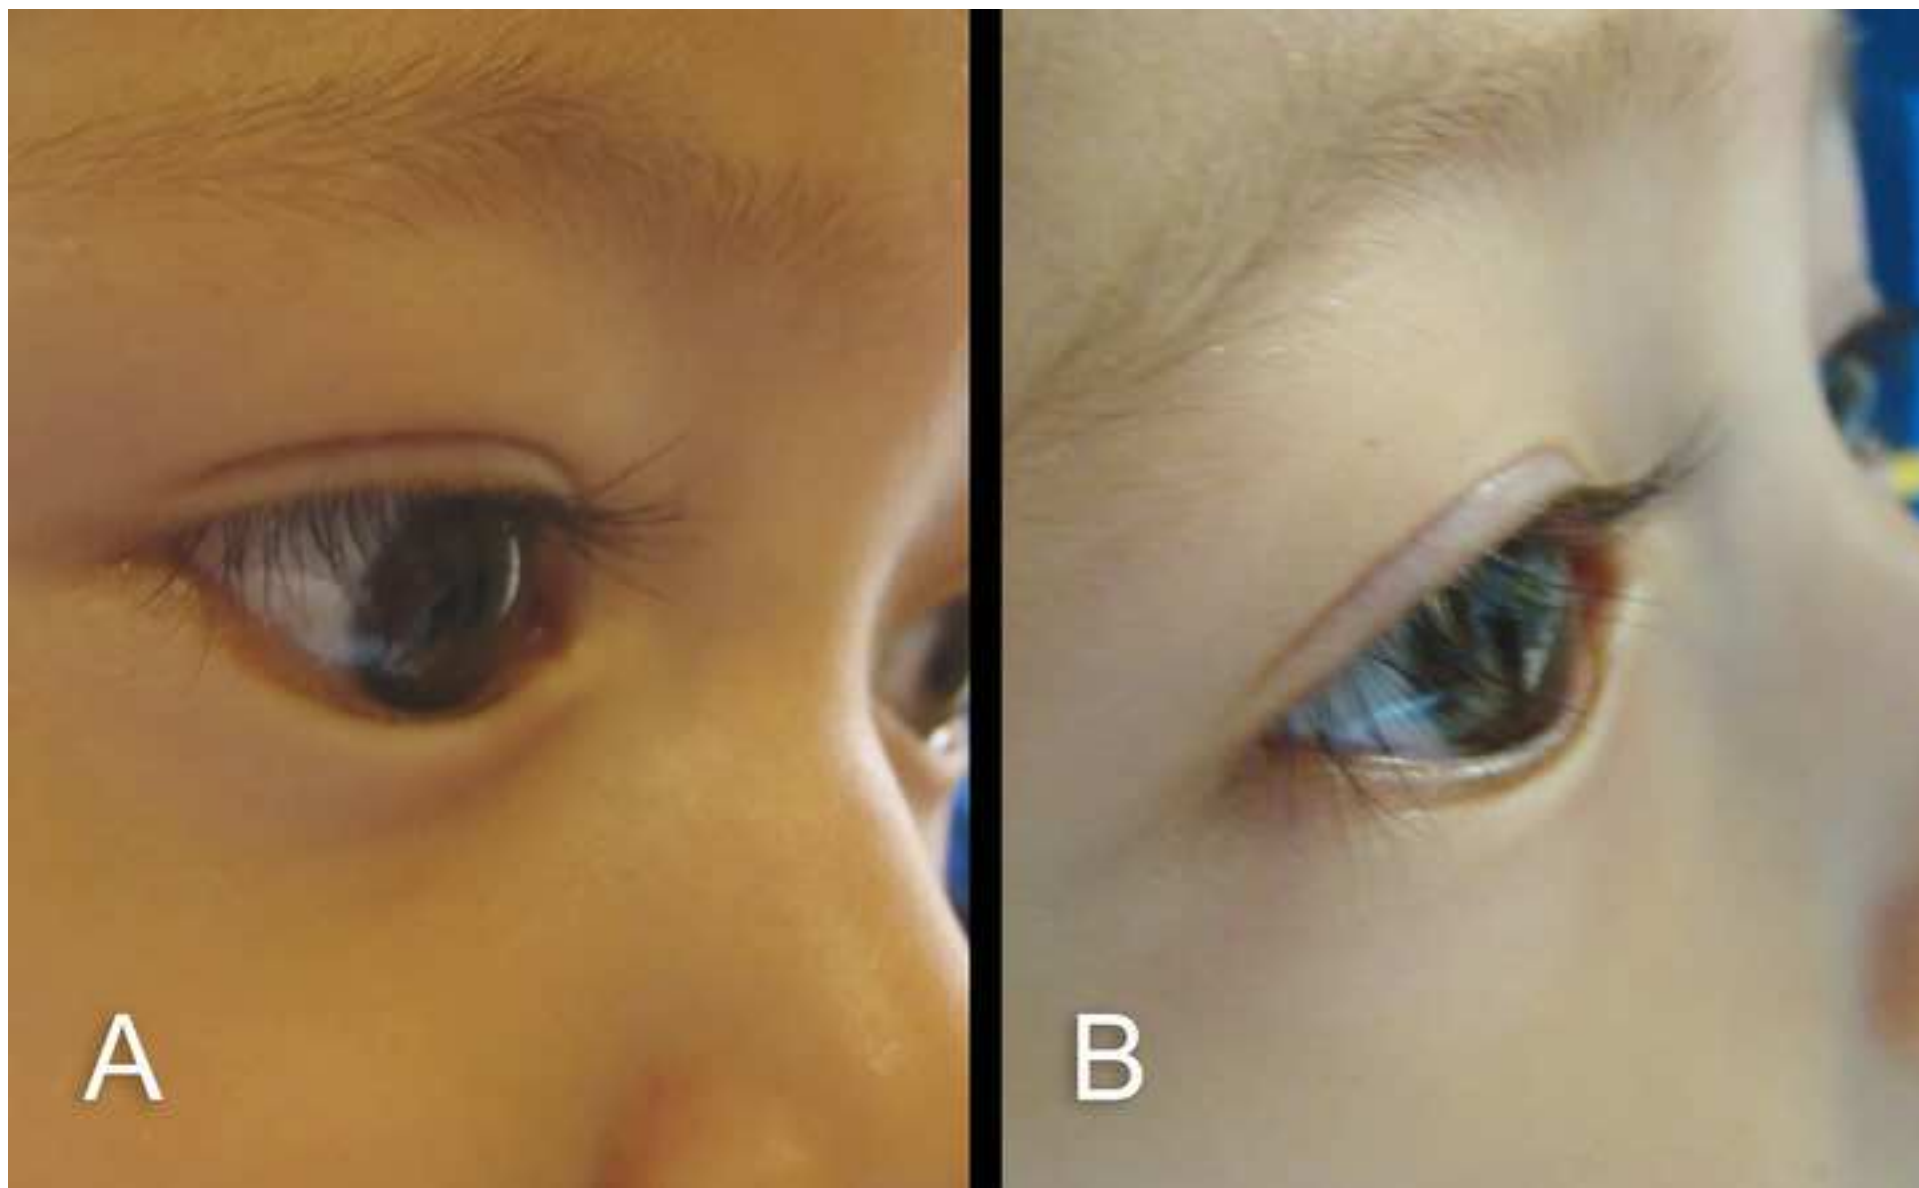

Signos y síntomas pre y post tratamiento TbA

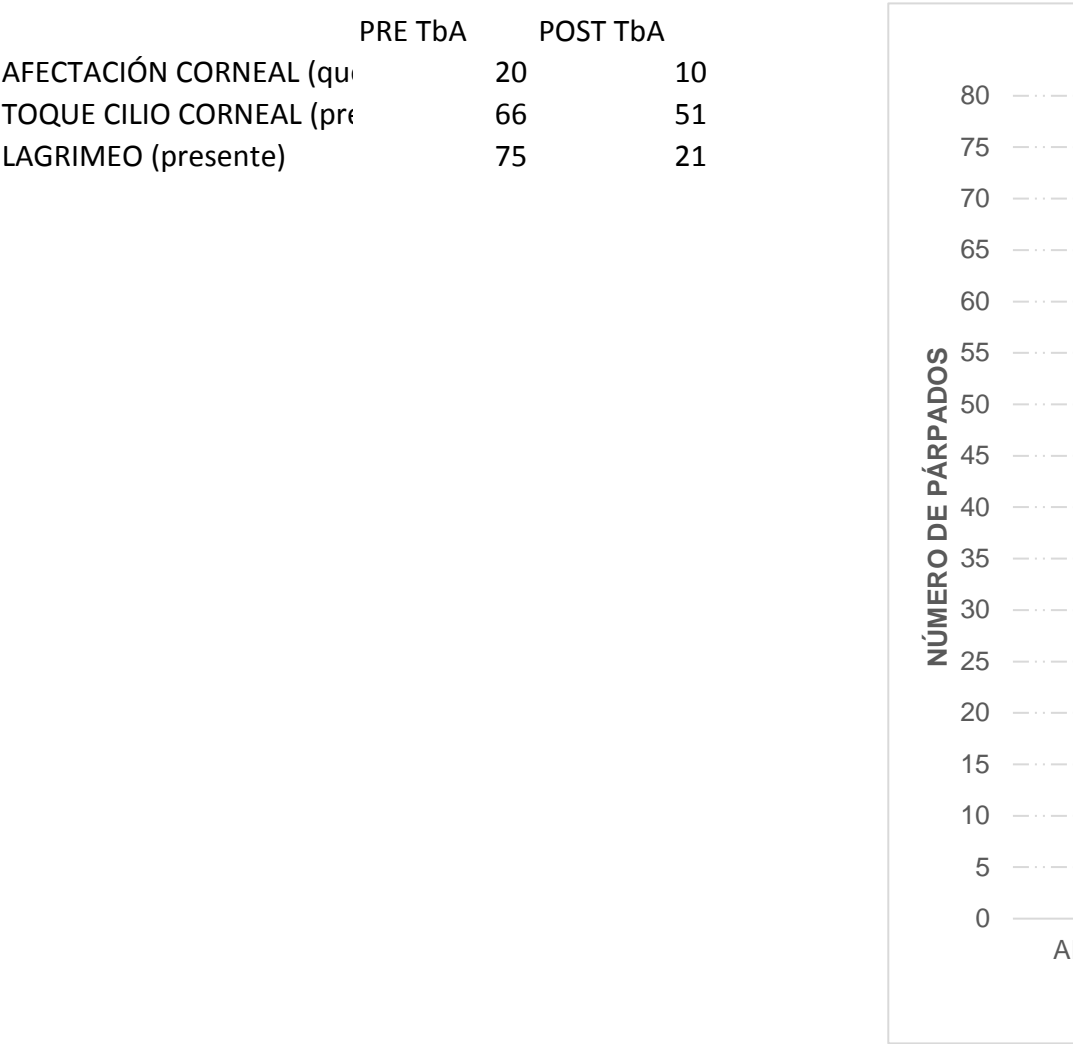

SIGNOS Y SÍNTOMAS PRE Y POST TbA

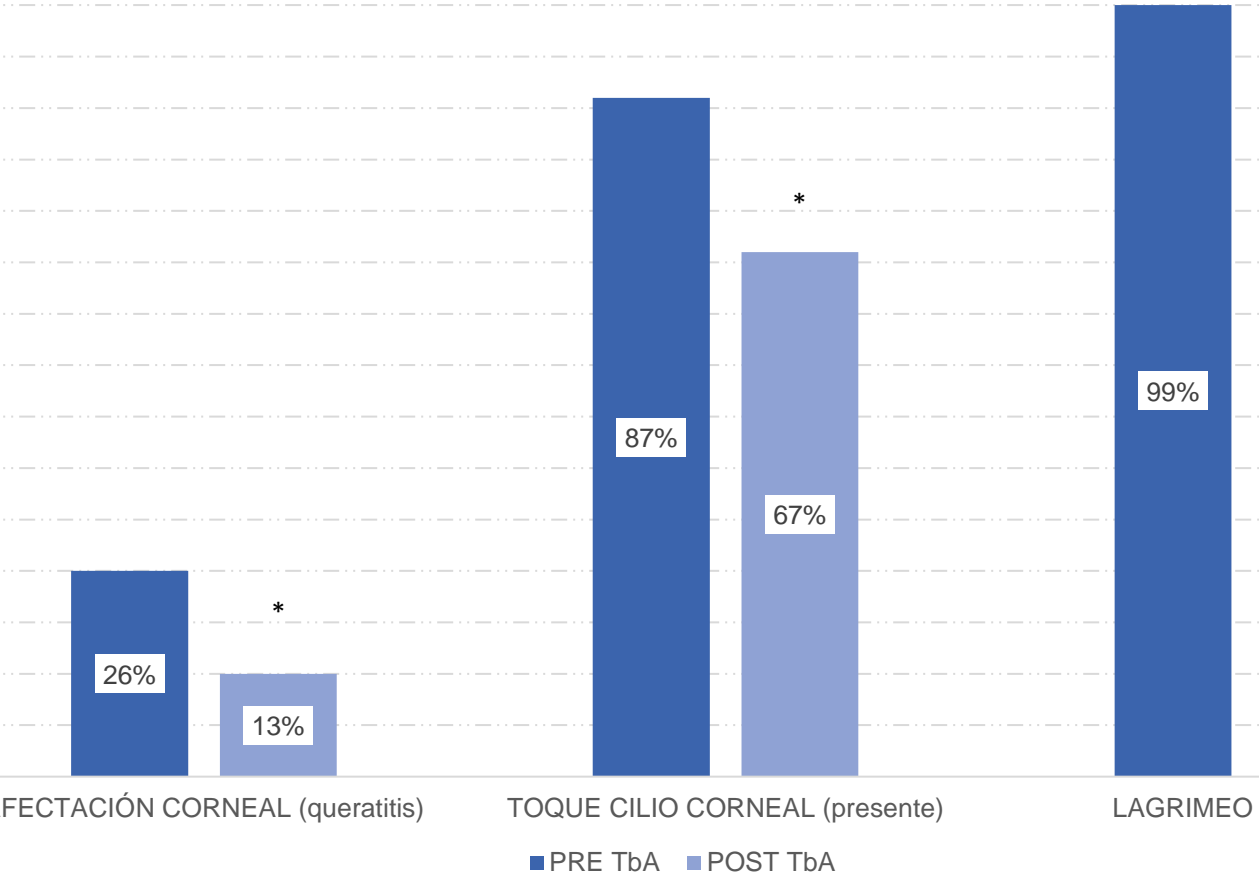



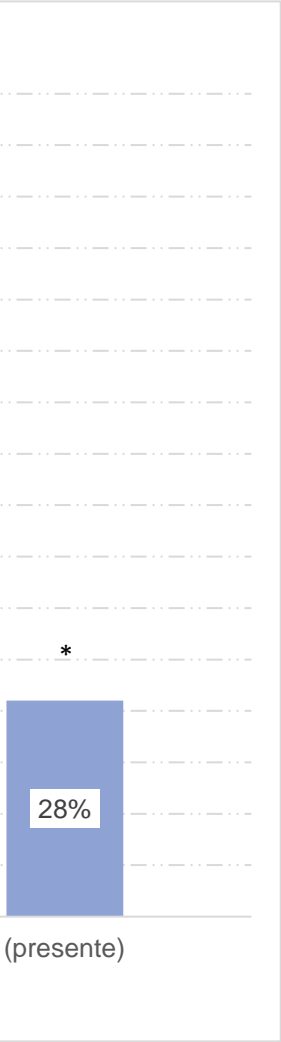

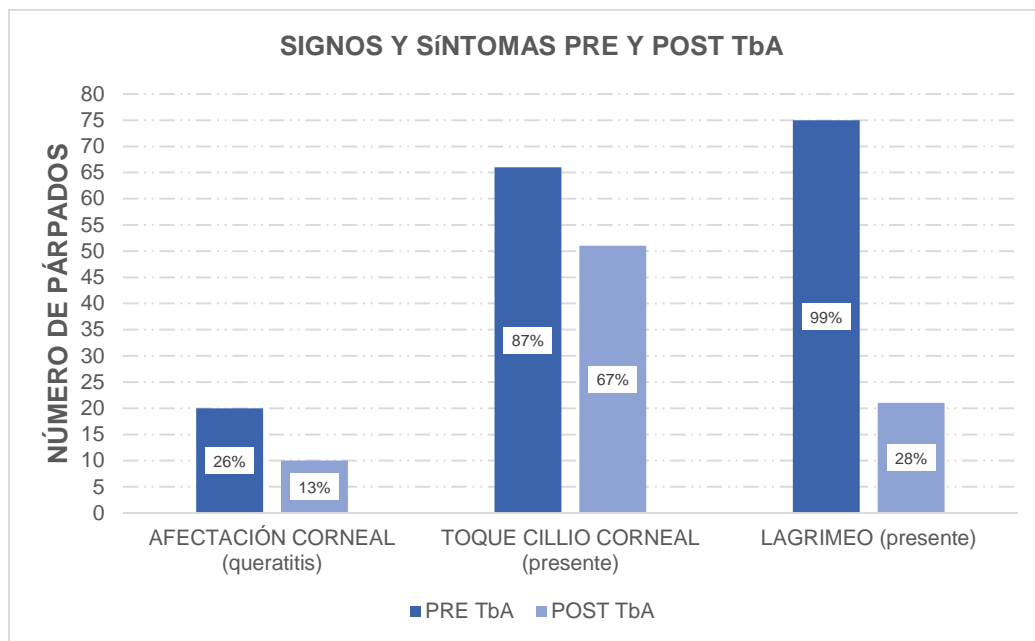

\* Test exacto de Fisher:  $p < 0.05$

Figura 3: Signos y síntomas previo y posterior a tratamiento con toxina botulínica. Medido en la primera visita post tratamiento que fue a las 12 semanas (rango 4-40)

## Textos para el pie de cada figura:

Figura 1: Paciente femenino de 1 año con epiblefaron bilateral. A: foto clínica post tratamiento inmediato con 5UI de TbA en región pretarsal del músculo orbicular. B: fotos clínicas al mes de tratamiento con 5UI de TbA. Se muestran ojo derecho y ojo izquierdo respectivamente sin toque cilio corneal. C: foto clínica frontal de ambos ojos al mes de tratamiento con 5UI de TbA.

Figura 2: Paciente masculino de 20 meses. A: foto clínica previa al tratamiento con TbA. Se evidencia el pliegue cutáneo marcado. B: foto clínica al mes de tratamiento con 5 UI De TbA se muestra una disminución de la altura del pliegue cutaneo por la relajación del músculo orbicular.

Figura 3: Signos y síntomas del epiblefaron previo y posterior a tratamiento con toxina botulínica. Medido en la primera visita post tratamiento, que fue a las 12 semanas (rango 4-40). \* Test exacto de Fisher:  $p < 0.05$ .

Tabla 1. Comparación de los signos y síntomas del epiblefaron previa y post tratamiento según el número de aplicaciones de TbA.

## Certificado de consentimiento

Yo Yésica de la Fuente Díez autora del artículo que lleva como título:  
“Experiencia del uso de la toxina botulínica tipo A para el tratamiento sintomático del epibleftaron en pacientes menores de 2 años en el Instituto de Oftalmología Conde Valenciana (I.A.P.) CDMX, México” confirmo que he obtenido todos los consentimientos requeridos por la legislación vigente para la publicación de cualquier dato personal o imágenes de pacientes, sujetos de investigación u otras personas que aparecen en los materiales enviados a Elsevier. He conservado una copia escrita de todos los consentimientos y, en caso de que Elsevier lo solicite, acepto proporcionar las copias o pruebas de que de dichos consentimientos han sido obtenidos.

Yésica de la Fuente Díez

15 de abril 2019 en Burgos

A handwritten signature in black ink on a light yellow background. The signature is stylized and appears to read 'Yésica de la Fuente'.

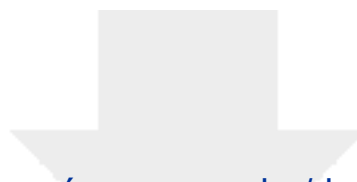

Pulse aquí para acceder/descargar

**Archivos especiales (Vídeo, etc.)**  
Certificado de consentimiento.docx

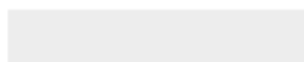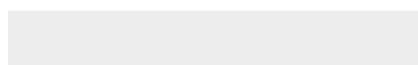

Supplement: mmc1 [file S0365669119302679:mmc1.pdf]
